# Supplementary material
Source: MDPI journal article supplement (https://www.mdpi.com/2073-4441/10/2/202)
Supplement: s1 [file s1]

Supplementary Materials: Floating Photocatalysts for Passive Solar Degradation of Naphthenic Acids in Oil Sands Process-Affected Water

Tim Leshuk 1,2,†, Harish Krishnakumar 1,2,†, Diogo de Oliveira Livera 1 and Frank Gu 1,2,*

1 Department of Chemical Engineering, University of Waterloo, Waterloo, ON N2L 3G1, Canada; tleshuk@uwaterloo.ca (T.L.); h3krishn@uwaterloo.ca (H.K.); ddoliver@uwaterloo.ca (D.d.O.L.)

2 Waterloo Institute for Nanotechnology, University of Waterloo, Waterloo, ON N2L 3G1, Canada

***** Correspondence: frank.gu@uwaterloo.ca; Tel.: +1-519-888-4567 (ext. 38605)

†These authors contributed equally to this work.





**Figure S1.** Solar irradiance measured throughout the duration of the photocatalytic experiment of Figure 2.





**Figure S2.** SEM image of TiO2 nanostructures on the surface of a FPC particle.





**Figure S3.** SEM images of uncoated glass microbubbles (GMBs) at (a) 500x and (b) 3000x magnification. GMBs were sputtered with Au prior to imaging.


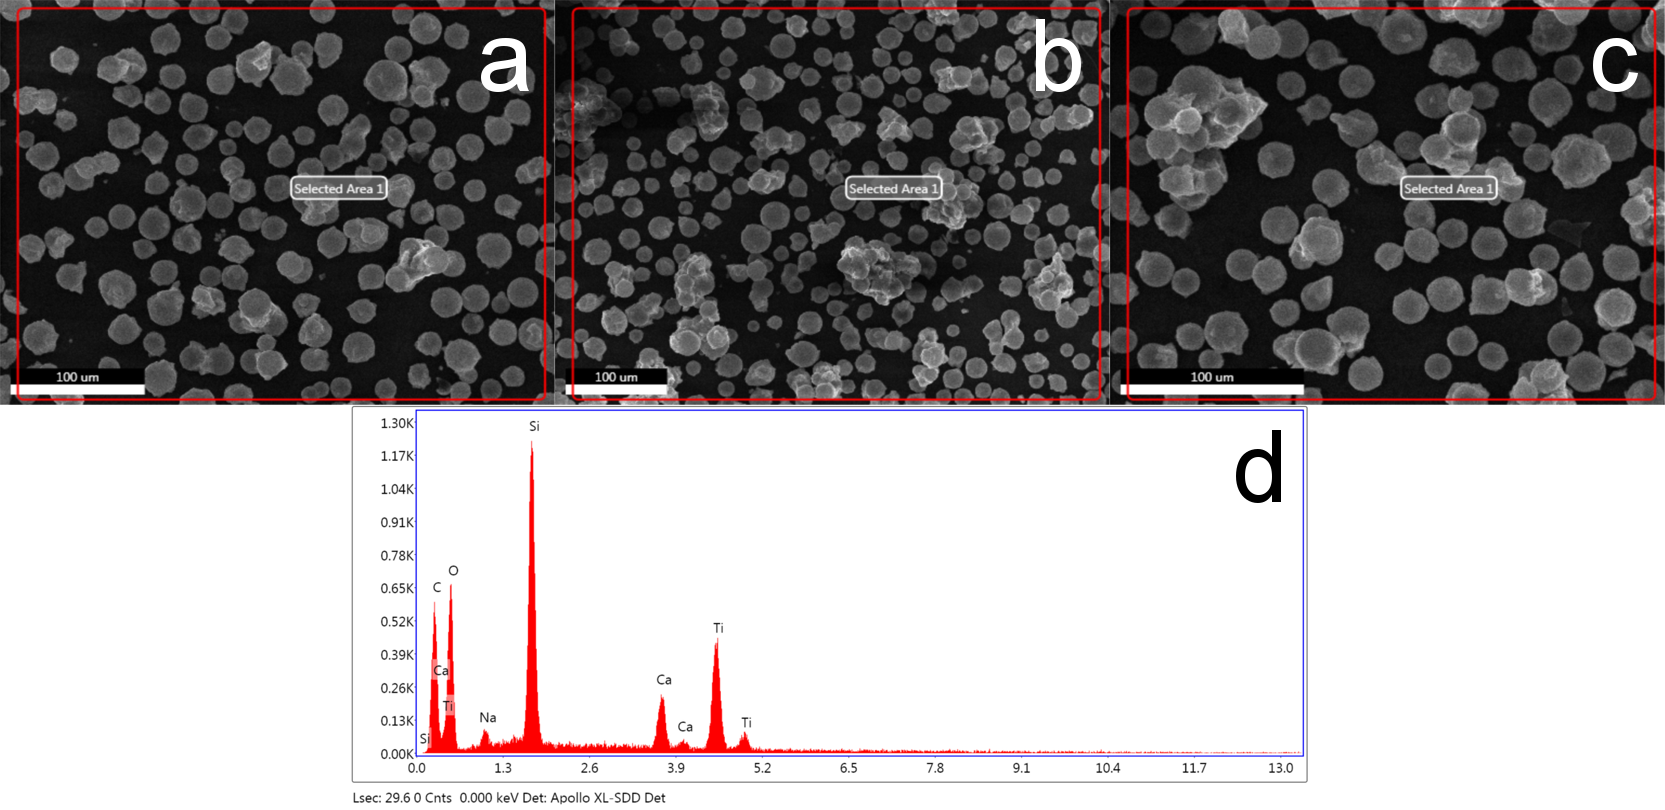


**Figure S4.** (a)-(c) SEM regions used for EDX elemental analysis and (d) typical EDX spectrum, as obtained from region (b).

**Table S1.** Results of EDX analysis, referring to SEM regions in Figure S4.

| **SEM Region** | **Atomic %** | | **TiO2:SiO2 mass ratio** | |
| --- | --- | --- | --- | --- |
| **SiK** | **TiK** |
| a | 4.49 | 1.64 | 0.326 | |
| b | 5.37 | 2.8 | 0.409 | |
| c | 5.15 | 2.2 | 0.362 | |
| **Average:** | | | | 36.6% | |
